# Supplementary material for: Facile utility of felumin, a biological dye for the first fluorimetric determination of l-tetramisole drug through an “on–off fluorescence” strategy
Source: Royal Society of Chemistry journal article supplement (doi:10.1039/d2ra08183k), 2023-01-01
Supplement: d2ra08183k1.pdf [file d2ra08183k1.pdf]

### Supplementary data

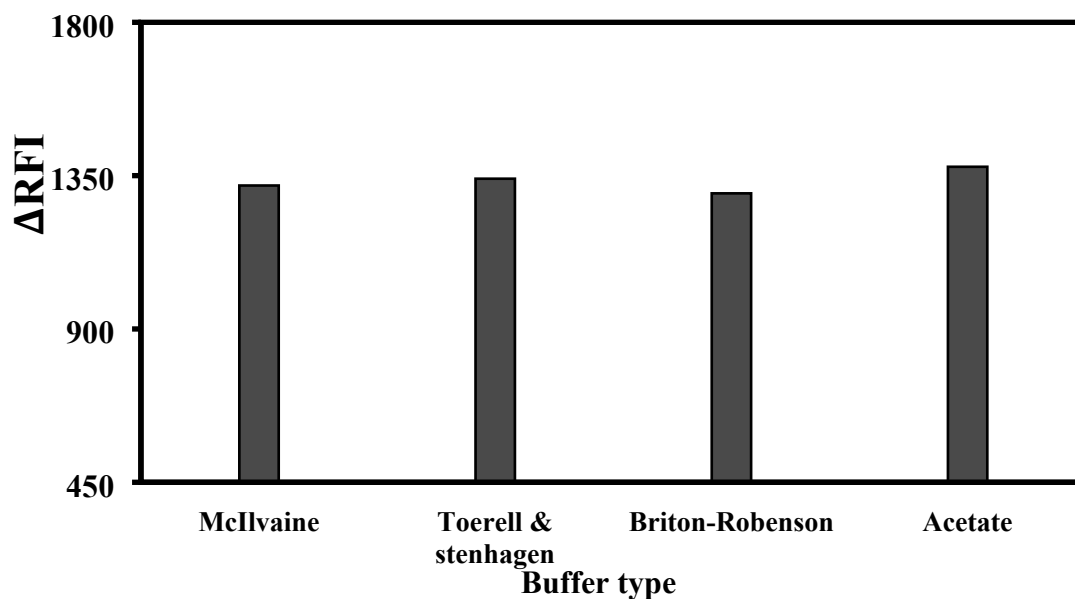

**SI figure 1:** Effect of pH controlling solution on the fluorescence quenching effect of the association complex formation between LTS and FLN.

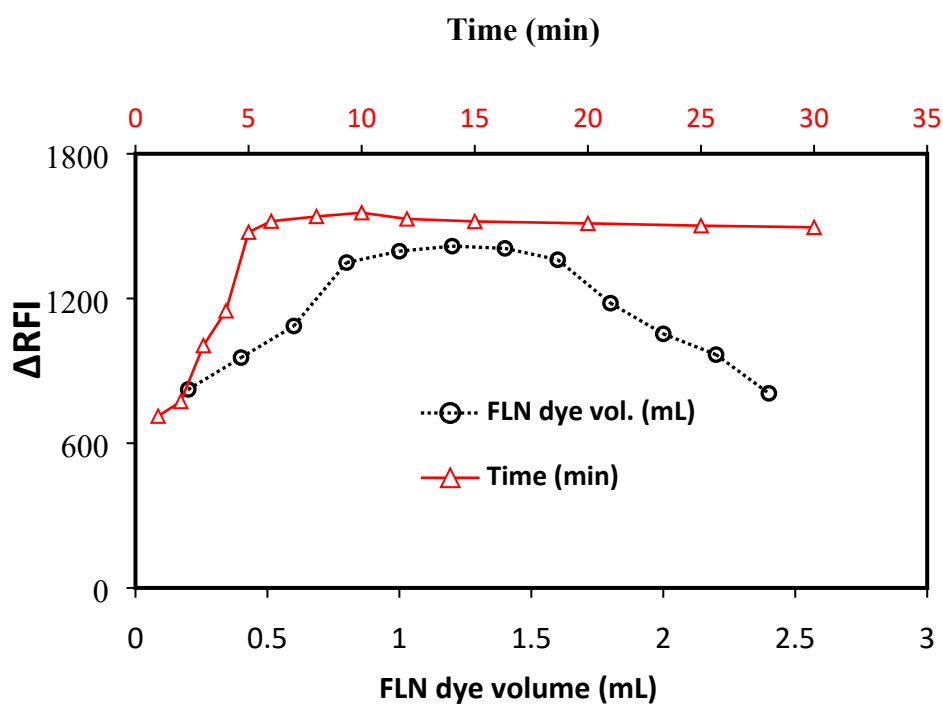

**SI figure 2:** The FLN dye volume and time impacts on the formed complex.

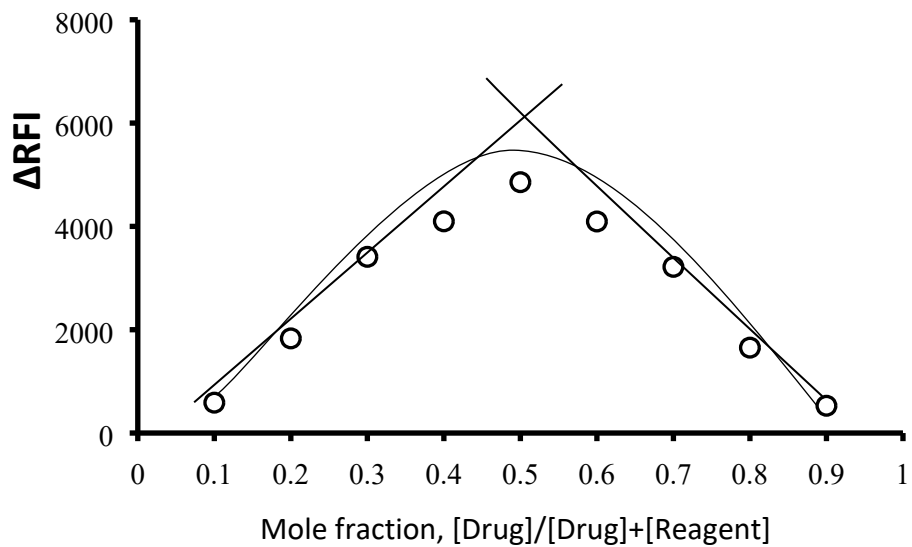

**SI figure 3:** Job's plot for association complex formation between LTS and FLN using an equimolar concentration of master solutions.

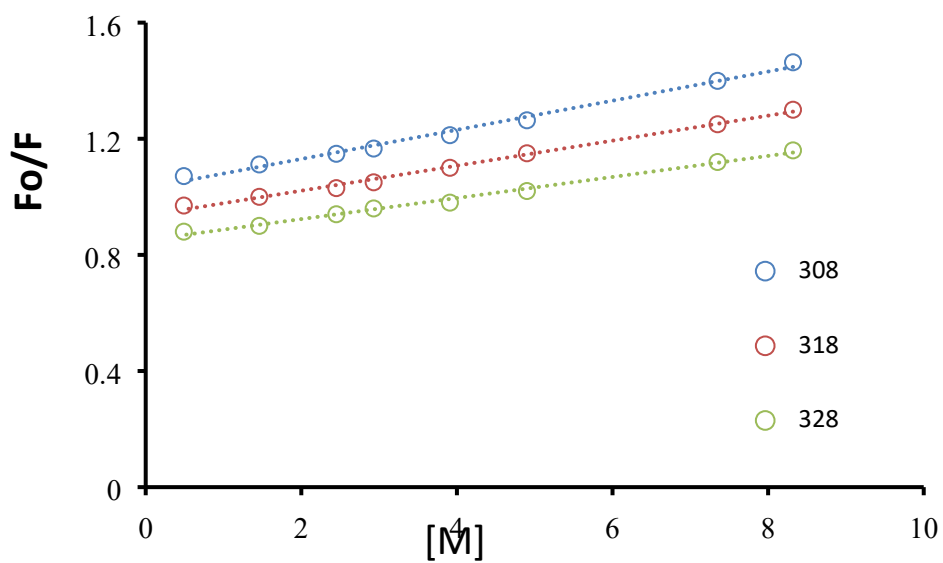

**SI figure 4:** LTS-induced FLN quenching depicted in the Stern–Volmer graph at three temperature levels.

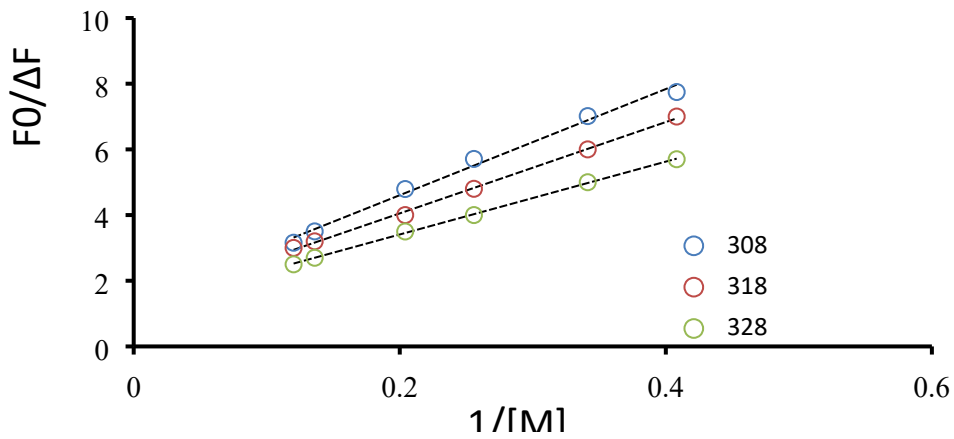

**SI figure 5:** The Modified Stern–Volmer charting for the LTS and FLN dye binding.

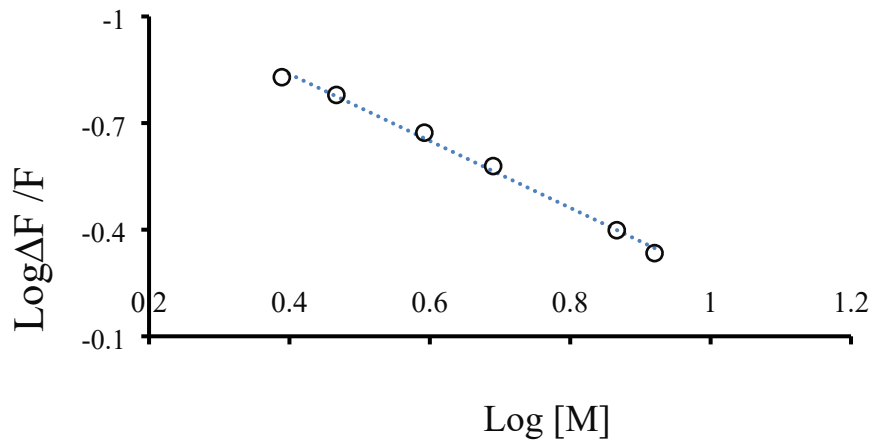

**SI figure 6:** The graphing of  $\log (f_0 - f) / f$  to  $\log [M]$  at operating temperature to determine the binding site(s).

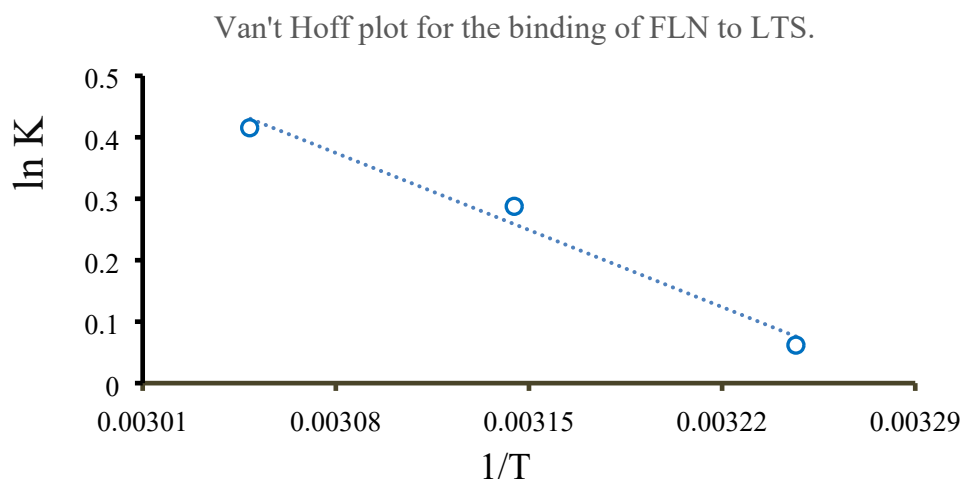

**SI figure 7:** Van't Hoff charting for the thermodynamic criteria

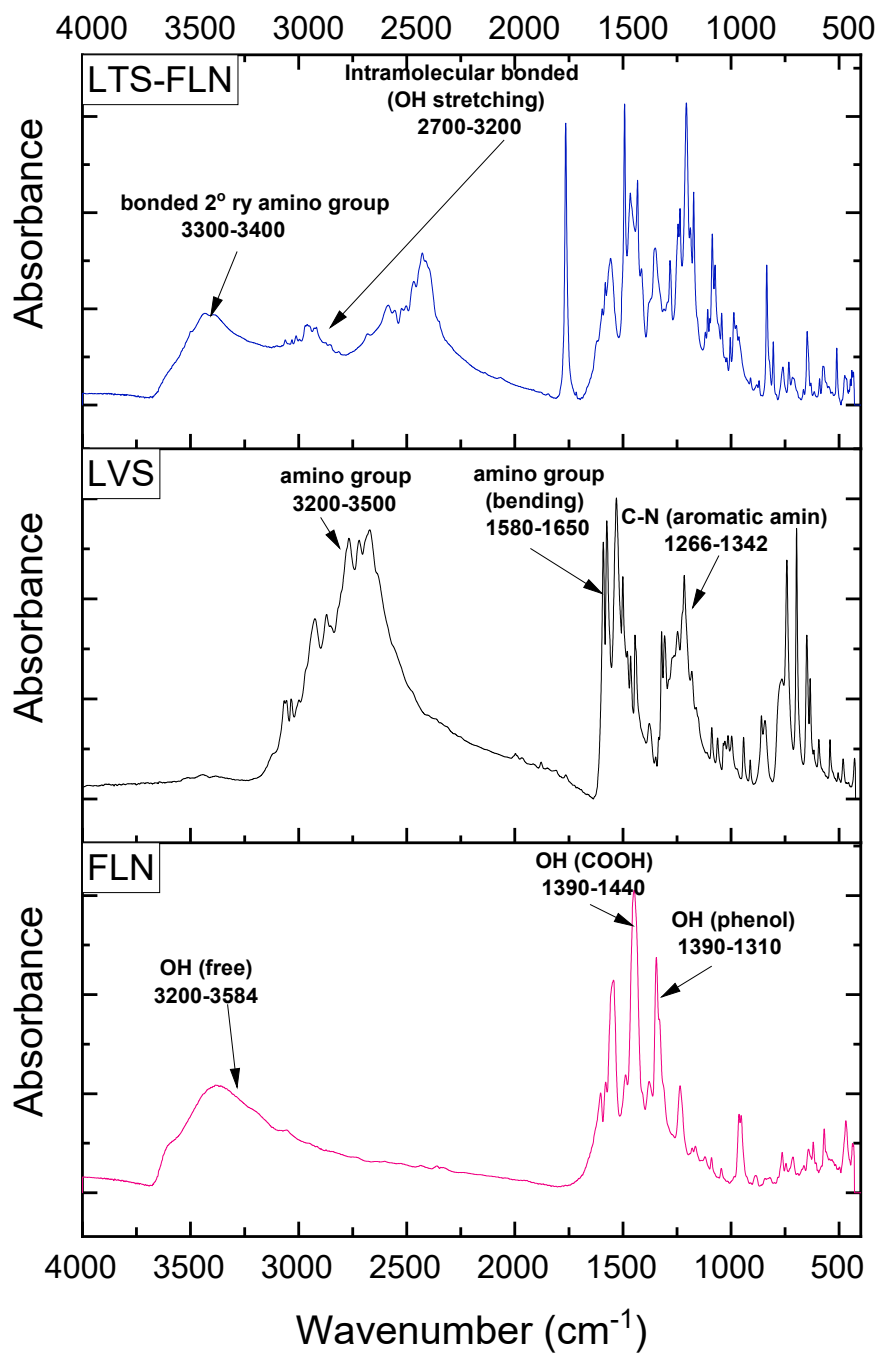

SI figure 8: FTIR confirmation and characterization of the complex.

**SI Table 1:** Polarity and dielectric constant scores of the solvents used.

| Solvent    | Polarity index | Dielectric constant |
|------------|----------------|---------------------|
| Water      | 9.0            | 80.2                |
| Methanol   | 6.6            | 32                  |
| Acetone    | 5.4            | 20.7                |
| Ethanol    | 5.2            | 24.8                |
| Dioxane    | 4.8            | 2.2                 |
| 2-propanol | 4.2            | 19.9                |

**SI Table 2:** A comparison of the current method with other reported methods and techniques.

| Item<br>Technique | Range*   | LOD*                  | LOQ*                 | Solvent<br>(If present)              | Detection $\lambda$<br>(nm.) | Reagent<br>danger | Ref.      |
|-------------------|----------|-----------------------|----------------------|--------------------------------------|------------------------------|-------------------|-----------|
| HPLC              | 2-10     | 0.121                 | 0.369                | MeOH/ACN                             | <b>225</b>                   | ++                | [1]       |
| Electrophoresis   | 5-200    | 0.017                 | 0.054                | MeOH/ACN                             | <b>210</b>                   | ++                | [2]       |
| Electroanalysis   | 0.02-1.2 | $2.04 \times 10^{-4}$ | $6.0 \times 10^{-4}$ | H <sub>2</sub> SO <sub>4</sub> /Eoth | -                            | ++                | [3]       |
| Spectrophotometry | 6-24     | 0.145                 | 0.484                | DCM                                  | <b>422</b>                   | +++               | [4]       |
| Fluorimetry       | 0.1-1.7  | 0.02                  | 0.062                | water                                | <b>554</b>                   | -                 | This work |

\*Concentration ( $\mu\text{g/mL}$ )

MeOH: methanol; Eoth: ethanol; CAN: Acetonitrile; DCM: dichloromethane

**SI Table 3:** Robustness evaluation of the proposed system

| Parameter               | Value | Recovery* % $\pm$ SD |
|-------------------------|-------|----------------------|
| pH                      | - 0.2 | 98.92 $\pm$ 0.36     |
|                         | + 0.2 | 100.22 $\pm$ 0.45    |
| Buffer volume (mL)      | - 0.2 | 98.54 $\pm$ 1.93     |
|                         | + 0.2 | 101.13 $\pm$ 1.21    |
| FLN reagent volume (mL) | - 0.2 | 97.34 $\pm$ 2.05     |
|                         | + 0.2 | 99.25 $\pm$ 0.74     |
| Time (min)              | - 1.0 | 97.68 $\pm$ 2.27     |
|                         | + 1.0 | 101.57 $\pm$ 1.69    |

\* The value is the mean of three measurements.

**SI Table 4:** Effect of common additives on the determination of LTS.

| <b>Additive</b>         | <b>Recovery<sup>a</sup> % ± SD<sup>b</sup></b> |
|-------------------------|------------------------------------------------|
| Lactose monohydrate     | 98.28 ± 1.93                                   |
| Polyethylene glycol     | 98.87 ± 1.65                                   |
| Disodium Edetate        | 99.76 ± 1.45                                   |
| Citric Acid Monohydrate | 96.76 ± 2.17                                   |
| Sodium Citrate          | 99.54 ± 0.62                                   |
| Maize starch            | 100.54 ± 1.21                                  |
| Lactose monohydrate     | 99.17 ± 1.64                                   |

<sup>a</sup>Average of three determinations, <sup>b</sup>SD Standard deviation.

**SI Table 5:** Selectivity and interference testing

| <b>Tested item</b>     | <b>Element</b>                | <b>Recovery* %</b> | <b>SD</b> |
|------------------------|-------------------------------|--------------------|-----------|
| <b>Ion</b>             | K <sup>+</sup>                | 98.35              | 1.87      |
|                        | Na <sup>+</sup>               | 99.14              | 1.29      |
|                        | Ca <sup>2+</sup>              | 99.76              | 1.54      |
|                        | Zn <sup>2+</sup>              | 98.23              | 2.05      |
|                        | Mg <sup>2+</sup>              | 99.48              | 2.12      |
|                        | Ni <sup>2+</sup>              | 100.16             | 0.96      |
|                        | K <sup>+</sup>                | 100.35             | 1.67      |
|                        | CO <sub>3</sub> <sup>2-</sup> | 98.68              | 1.71      |
|                        | SO <sub>4</sub> <sup>2-</sup> | 99.12              | 1.57      |
|                        | NO <sub>3</sub> <sup>-</sup>  | 98.34              | 1.51      |
|                        | HCO <sub>3</sub>              | 97.56              | 2.51      |
|                        | I <sup>-</sup>                | 99.45              | 1.79      |
|                        | Cl <sup>-</sup>               | 97.68              | 2.43      |
| <b>Small molecules</b> | Galactose                     | 98.34              | 1.93      |
|                        | Glucose                       | 99.32              | 1.26      |
|                        | Sucrose                       | 99.37              | 1.82      |
|                        | Glucose                       | 100.54             | 1.28      |
|                        | Lactose                       | 100.48             | 1.65      |

\* Average of three determinations

**SI Table 6:** Application of the proposed system to quantify LTS in vitro

| Spiked human plasma              |                     | Spiked human urine               |                     |
|----------------------------------|---------------------|----------------------------------|---------------------|
| Amount ( $\mu\text{g mL}^{-1}$ ) | %Recovery* $\pm$ SD | Amount ( $\mu\text{g mL}^{-1}$ ) | %Recovery* $\pm$ SD |
| 0.2                              | 98.21 $\pm$ 1.32    | 0.2                              | 97.81 $\pm$ 0.55    |
| 0.5                              | 98.76 $\pm$ 0.92    | 0.5                              | 96.12 $\pm$ 1.18    |
| 1.0                              | 98.08 $\pm$ 1.88    | 1.0                              | 98.07 $\pm$ 1.13    |

\* Each result is the average of three separate determinations.

**SI Table 7:** Application of the proposed method for Determination of LTS in Real Human Plasma after a dose of (Katrex, 40 mg/tab)

| Parameter <sup>a</sup>                  | Value       |
|-----------------------------------------|-------------|
| $t_{\text{max}}$ (hr.)                  | 1.5         |
| $C_{\text{max}}$ (ng mL <sup>-1</sup> ) | 1600 (1483) |
| $t_{1/2}$ (hr.)                         | 3.3-5.1     |
| Rec* %                                  | 92.74 %     |
| SD                                      | 1.36        |

<sup>a</sup>Parameters:  $t_{\text{max}}$ , time of peak concentration;  $C_{\text{max}}$ , peak plasma concentration;  $t_{1/2}$ , terminal elimination half live; Rec%, recovery percent; SD, and RSD%, standard deviation and relative standard deviation respectively.

\* mean of three replicates

**SI Table 8:** The greenness evaluation of the proposed fluorimetric system through the penalty points score.

| Item                    | Parameter   | PP score |
|-------------------------|-------------|----------|
| Technique               | Fluorimetry | 0        |
| Reagent                 | FLN         | 1        |
| Amount of reagent       | < 10 mL     | 1        |
| Solvent(s)              | Water       | 0        |
| Heating                 | -           | 0        |
| Temperature             | 25 °C       | 0        |
| Cooling                 | -           | 0        |
| pH                      | 3.7         | 0        |
| Energy (kWh per sample) | 1.0 >       | 0        |
| Waste                   | 1–10 (mL)   | 3        |
| Occupational hazards    |             | 0        |
| (TPPs)                  |             | 5        |
| Eco-scale total score   | = 100 – TPP | 95       |

TPPs is the total penalty points.

## References

- [1] P. Ravisankar, G.D. Rao, Development and validation of RP-HPLC method for determination of levamisole in bulk and dosage form, *Asian J Pharm Clin Res*, 6 (2013) 169-173.
- [2] L. Xu, F. Luan, F. Hu, H. Liu, Y. Gao, Development and validation of a non-aqueous capillary electrophoresis method for simultaneous estimation of mebendazole and levamisole hydrochloride in compound mebendazole tablets, *Analytical Methods*, 5 (2013) 762-766.
- [3] B.C. Lourencao, R.A. Medeiros, S.S. Thomasi, A.G. Ferreira, R.C. Rocha-Filho, O. Fatibello-Filho, Amperometric flow-injection determination of the anthelmintic drugs ivermectin and levamisole using electrochemically pretreated boron-doped diamond electrodes, *Sensors and Actuators B: Chemical*, 222 (2016) 181-189.
- [4] A.M. El-Didamony, Spectrophotometric determination of benzydamine HCl, levamisole HCl and mebeverine HCl through ion-pair complex formation with methyl orange, *Spectrochimica Acta Part A: Molecular and Biomolecular Spectroscopy*, 69 (2008) 770-775.
